# Supplementary material for: Surface modified mesoporous nanocast carbon as a catalyst for aqueous sulfide oxidation and adsorption of the produced polysulfides
Source: Royal Society of Chemistry journal article supplement (doi:10.1039/c8nj00922h), 2018-01-01
Supplement: c8nj00922h1.pdf [file c8nj00922h1.pdf]

## Supplementary Material

### Surface modified mesoporous nanocast carbon as catalyst for aqueous sulfide oxidation and adsorption of produced polysulfides

Deicy Barrera<sup>a</sup>, Fernanda Gomes de Mendonça<sup>b</sup>, Arthur Henrique de Castro<sup>c</sup>,  
João Paulo de Mesquita<sup>c</sup>, Rochel Montero Lago<sup>b\*</sup>, Karim Sapag<sup>a\*</sup>

<sup>a</sup>Laboratorio de Sólidos Porosos, Instituto de Física Aplicada, CONICET, Universidad Nacional de San Luis,, San Luis, Argentina

<sup>b</sup>Departamento Química, Universidade Federal de Minas Gerais, Belo Horizonte, Brazil

<sup>c</sup>Departamento de Química, Universidade Federal dos Vales do Jequitinhonha e Mucuri, Diamantina, Brazil

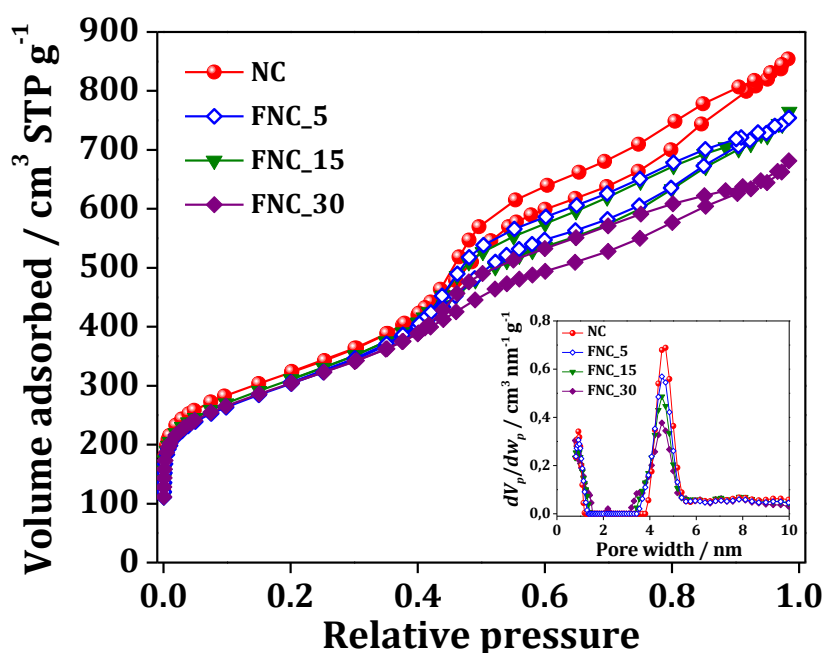

**Figure S1.** N<sub>2</sub> adsorption – desorption isotherms at 77 K of NC and FNC materials. Inset: pore size distribution of NC and FNC materials.

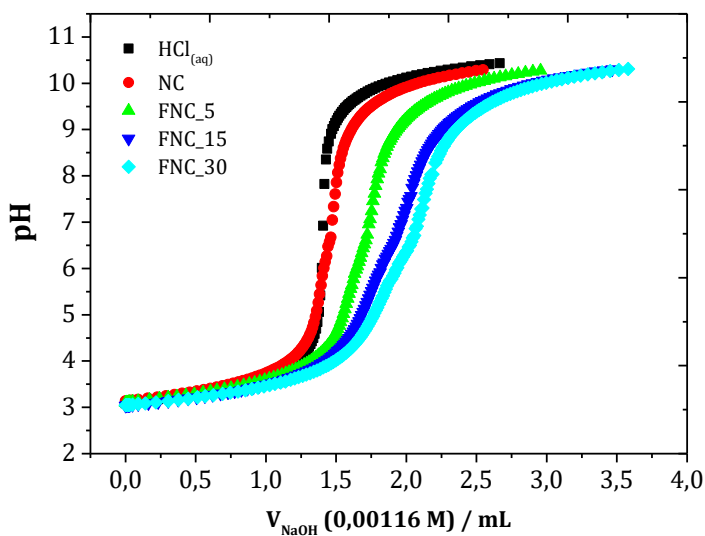

**Figure S2.** Experimental data of potentiometric titrations for HCl solution, NC and FNC samples.

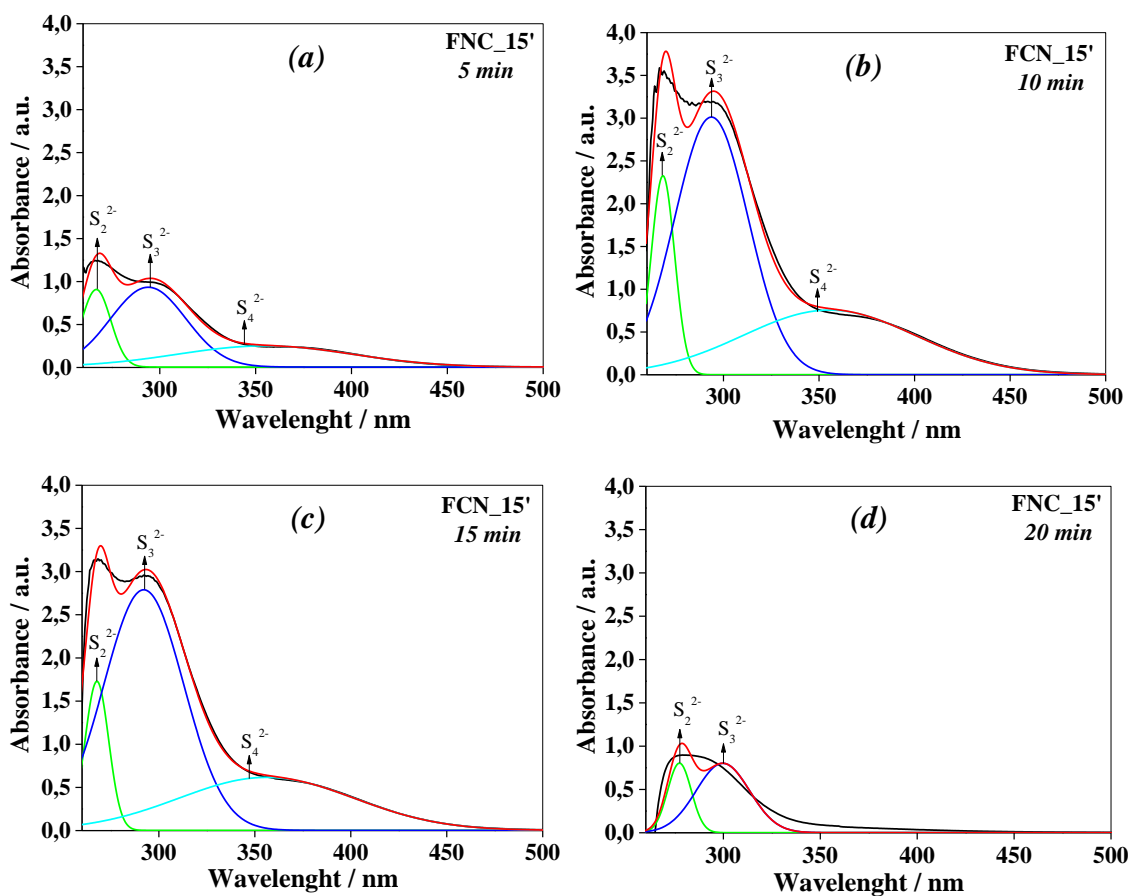

**Figure S3.** Deconvolution of UV-Vis spectra obtained for FCN<sub>15</sub> after (a) 5, (b) 10, (c) 15 and (d) 20 minutes of sulfide oxidation kinetics.

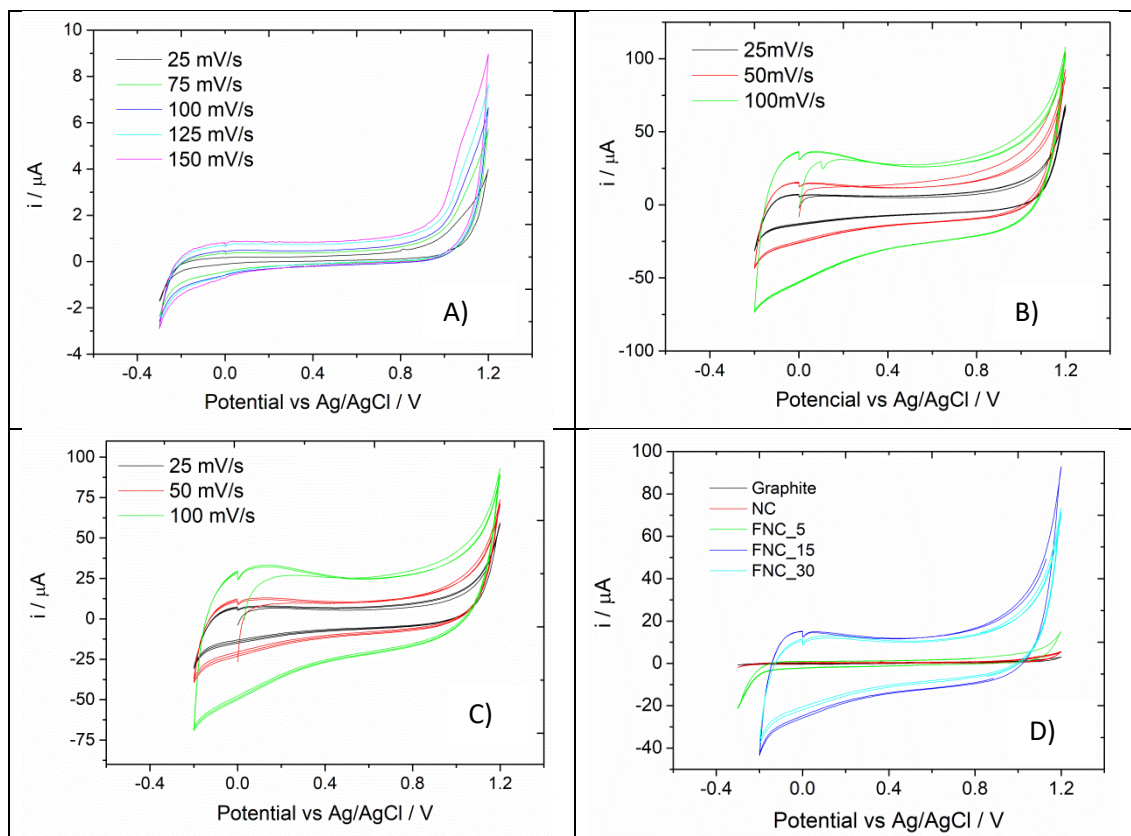

**Figure S4.** Cyclic voltammograms obtained in KCl 0.10 mol L<sup>-1</sup> with different scan rate. A) NC, B) FNC\_15, C) FNC\_30 and D) Comparison of the capacitive currents of the electrodes in 50 mVs<sup>-1</sup>.

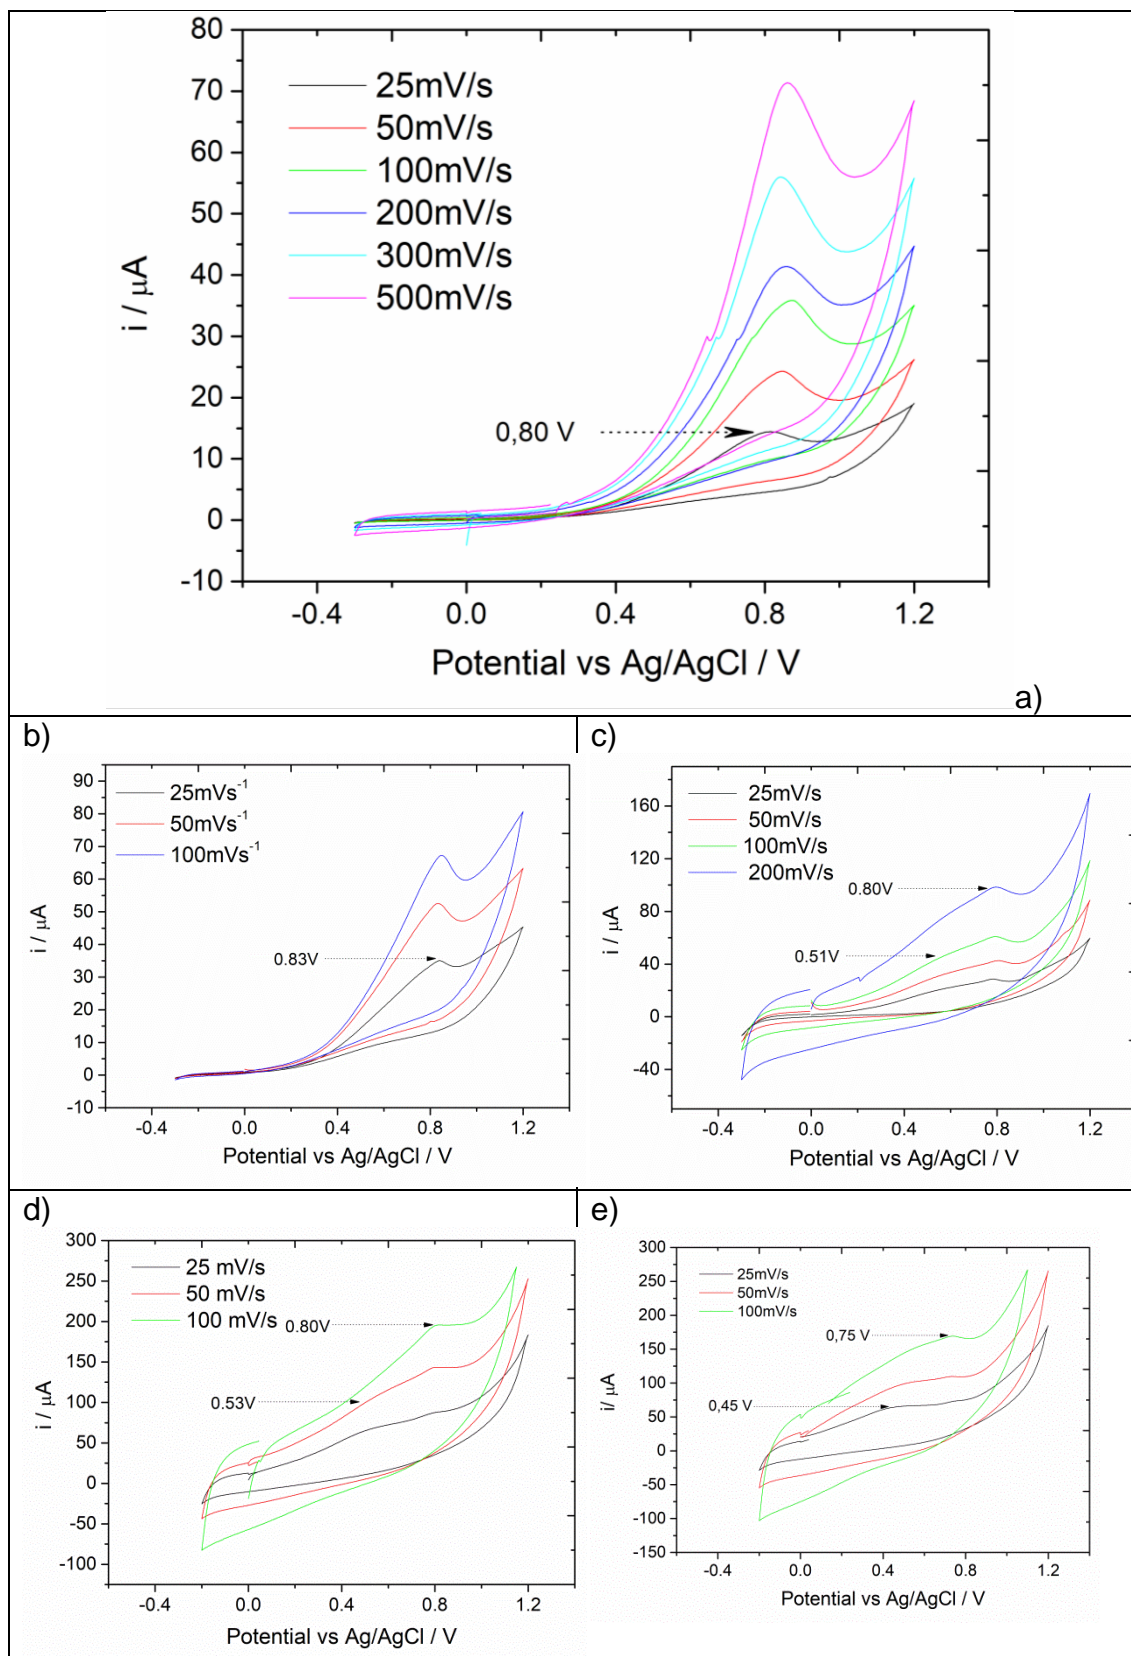

**Figure S5.** Cyclic voltammograms obtained in  $\text{KCl } 0.10 \text{ mol L}^{-1}/\text{Na}_2\text{S } 0.001 \text{ mol L}^{-1}$  with different scan rate. a) graphite, b) NC, c) FNC\_5, d) FNC\_15 and e) FNC\_30.

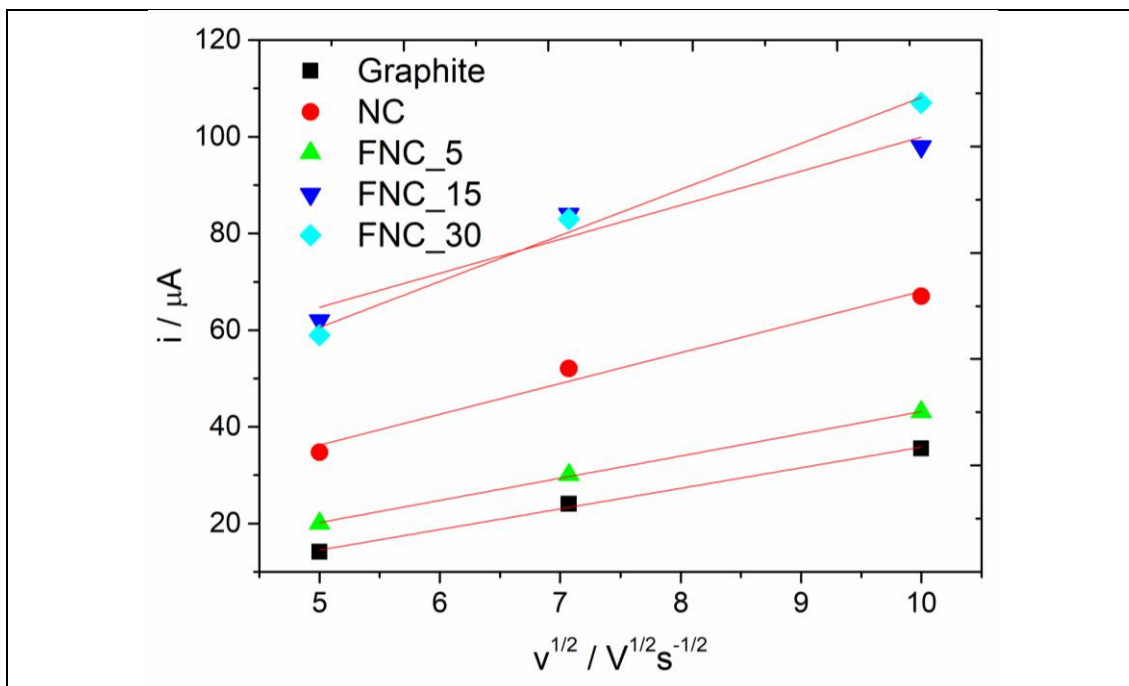

**Figure S6.** Anodic peak current versus the square root of the scan rate. The current values shown were obtained in different potentials vs Ag / AgCl: Graphite: 0.84V; NC = 0.83V; FNC\_5: 0.53; FNC\_15: 0.51V and FNC\_30: 0.43V.
